# Supplementary material for: On the problem of cobalt chloride-based catalysts in the Fischer–Tropsch synthesis
Source: Royal Society of Chemistry journal article supplement (doi:10.1039/d2cy02182j), 2023-01-01
Supplement: d2cy02182j1.pdf [file d2cy02182j1.pdf]

## Supplementary Data

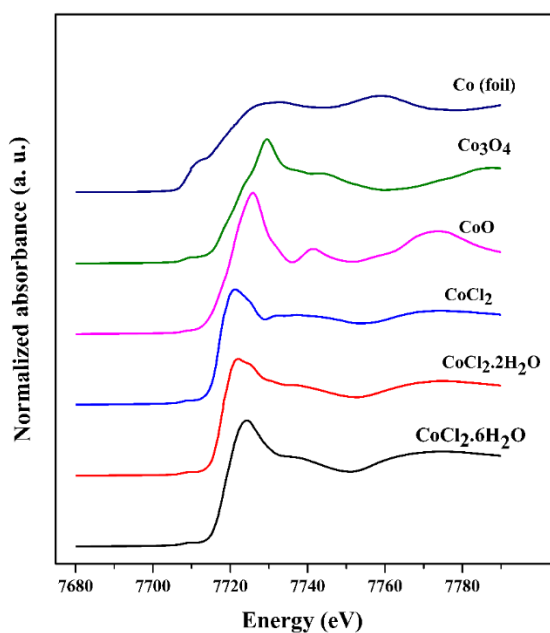

**Figure S1.** XANES spectra of standard materials

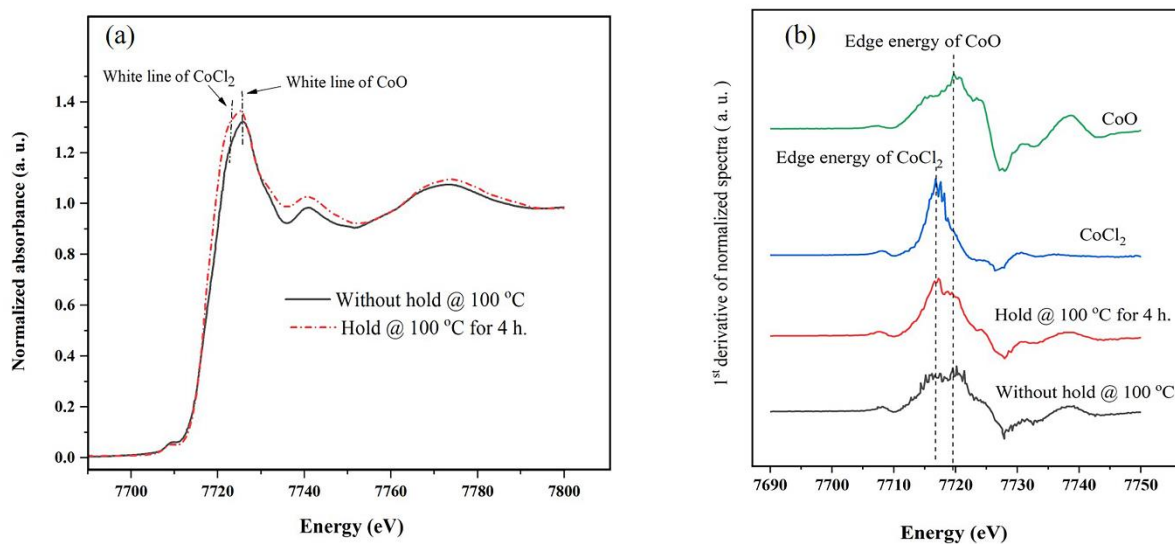

**Fig. S2.** Comparison of XANES (a) and first-derivative of normalized spectra (b) of samples treated in N<sub>2</sub> without hold and hold at 100 °C for 4 h, measured at 700 °C.

**Table S1** Co K-edge energy position of the sample as a function of temperature compared to Co metal foil (7709 keV)

| sample                                                                                 | K-edge position (eV) | $\Delta E$ (eV) |
|----------------------------------------------------------------------------------------|----------------------|-----------------|
| Standard                                                                               |                      |                 |
| Co foil (neutral state)                                                                | 7709.0               | 0               |
| CoO                                                                                    | 7718.8               | 9.8             |
| Co <sub>3</sub> O <sub>4</sub>                                                         | 7721.6               | 12.6            |
| CoCl <sub>2</sub>                                                                      | 7717.4               | 8.3             |
| CoCl <sub>2</sub> · 2 H <sub>2</sub> O                                                 | 7718.1               | 9.1             |
| CoCl <sub>2</sub> · 6 H <sub>2</sub> O                                                 | 7718.2               | 9.2             |
| Sample treated in N <sub>2</sub> as a function of temperature                          |                      |                 |
| 28                                                                                     | 7718.2               | 9.2             |
| 50                                                                                     | 7718.1               | 9.1             |
| 75                                                                                     | 7718.0               | 9.0             |
| 100                                                                                    | 7717.7               | 8.7             |
| 150                                                                                    | 7717.5               | 8.5             |
| 200                                                                                    | 7717.5               | 8.5             |
| 250                                                                                    | 7717.5               | 8.5             |
| 300                                                                                    | 7717.5               | 8.5             |
| 350                                                                                    | 7717.7               | 8.7             |
| 400                                                                                    | 7717.9               | 8.9             |
| 425                                                                                    | 7718.0               | 9.0             |
| 450                                                                                    | 7718.1               | 9.1             |
| 500                                                                                    | 7718.3               | 9.3             |
| 550                                                                                    | 7728.3               | 9.3             |
| 600                                                                                    | 7718.3               | 9.3             |
| 650                                                                                    | 7718.3               | 9.3             |
| 700                                                                                    | 7718.3               | 9.3             |
| 750                                                                                    | 7718.3               | 9.3             |
| 800                                                                                    | 7718.3               |                 |
| Sample treated in N <sub>2</sub> , hold at 100 °C for 4 h as a function of temperature |                      |                 |
| 28                                                                                     | 7718.2               | 9.2             |
| 50                                                                                     | 7718.1               | 9.1             |
| 75                                                                                     | 7718.0               | 9.0             |
| 100                                                                                    | 7717.4               | 8.4             |
| 150                                                                                    | 7717.4               | 8.4             |
| 200                                                                                    | 7717.4               | 8.4             |
| 250                                                                                    | 7717.4               | 8.4             |
| 300                                                                                    | 7717.4               | 8.4             |
| 350                                                                                    | 7717.6               | 8.6             |
| 400                                                                                    | 7717.7               | 8.7             |
| 450                                                                                    | 7717.8               | 8.8             |
| 500                                                                                    | 7717.8               | 8.8             |
| 550                                                                                    | 7717.8               | 8.8             |
| 600                                                                                    | 7717.8               | 8.8             |
| 650                                                                                    | 7717.8               | 8.8             |
| 700                                                                                    | 7717.8               | 8.8             |
